# Supplementary material for: TPF induction chemotherapy versus PF adjuvant chemotherapy plus concurrent chemoradiotherapy for locally advanced nasopharyngeal carcinoma: a multicenter, randomized controlled phase III trial
Source: Research Square preprint supplement (doi:10.21203/rs.3.rs-4166765/v1), 2024-04-26
Supplement: Supplementary file 1 [file 084a498deacfb281d1024385.docx]

**Supplementary appendix**

**Contents**

Quantification of plasma EBV DNA copy--------------------------------------------------------- ----------------------------------------------------------------3

eTable 1. List of Participating Centers------------------------------------------------------------------------------------------------------------------------------4

eTable 2. Compliance to chemotherapy by the two groups------------------------------------------------------------------------------------------------------4

eTable 3. Detailed information on the radiotherapy received by the two groups.-----------------------------------------------------------------------------5

eTable 4. 3-year progression-free survival for pre-treatment EBV DNA copies undetectable population,stage III and stage IVa population analysis------------------------------------------------------------------------------------------------------------------------------------------------------------------5

eTable 5. 3-year overall survival for per-protocol,pre-treatment of EBV DNA copies detectable or undetectable population,stage III and stage IVa population analysis------------------------------------------------------------------------------------------------------------------------------------------------6

eTable 6. 3-year locoregional relapse-free survival for per-protocol,pre-treatment of EBV DNA copies detectable or undetectable population,stage III and stage IVa population analysis------------------------------------------------------------------------------------------------------------7

eTable 7. 3-year distant metastasis-free survival for per-protocol,pre-treatment of EBV DNA copies detectable or undetectable population,stage III and stage IVa population analysis--------------------------------------------------------------------------------------------------------------------------------8

eTable 8. 3-year survival for intention-to-treat,per-protocol, pre-treatment of EBV DNA copies detectable or undetectable population,stage III and stage IVa population analysis--------------------------------------------------------------------------------------------------------------------------------9-10

eTable 9. Response to treatment and survival outcomes in the two group patients------------------------------------------------------------------------------------------------------------------------------------------------------------11-12

eTable 10.EBV DNA copies after treatment in two groups----------------------------------------------------------------------------------------------------13

eTable 11.Acute Adverse Events in Safety Population------------------------------------------------------------------------------------------------------14-17

eTable 12. Salvage treatments after relapse and metastasis-------------------------------------------------------------------------------------------------18-19

eTable13. Ways for follow-up assessments----------------------------------------------------------------------------------------------------------------------19

eFigure 1. Nomogram graph for progression-free survival in different patient subgroups-------------------------------------------------------------------------------------------------------------------------------------------------------------20

**Quantification of plasma EBV DNA**

Samples of peripheral blood (5ml) were collected from all patients and subjected to centrifugation at *1600g for plasma isolation. Subsequently, 500-1000 μL of each plasma sample was utilized for DNA extraction following the instructions provided by the QIAamp Blood Kit (Qiagen, Hilden, Germany). To quantify EBV DNA levels, a polymerase chain reaction (PCR) assay targeting the BamHI-W region was conducted. The PCR system comprised amplification primers W-44F (5’-AGTCTCTGCCTCCAGGCA-3’) and W-119R (5’-ACAGAGGGCCTGTCCACCG-3’), along with the dual-labeled fluorescent probe W-67T (5’-[FAM] CACTGTCTGTAAAGTCCAGCCTCC [TAMRA]-3’). The detectable level of EBV DNA copy was defined as >0/ml, while the undetectable level was defined as <0/ml.

For patient screening, the EBV DNA level was assessed within a two-week period prior to enrollment. Subsequently, the measurement of EBV DNA was conducted during the screening phase, including at the initiation of the first cycle chemotherapy, and also at each subsequent follow-up visit.

**Supplementary Tables**

| **Centre** | **Principle investigator** | **Patients.No(%)** |
| --- | --- | --- |
| Affiliated Cancer Hospital of Guizhou Medical University | Feng Jin | 248(93.23) |
| The Second Affiliated Hospital of Guizhou Medical University | Faqiang Ma | 10(3.76) |
| The Second Affiliated Hospital of Zunyi Medical University | Xiaoxia Gou | 2(0.75) |
| Guihang Guiyang Hospital | Li Luo | 6(2.26) |

**eTable 1. List of Participating Centers**

**eTable 2. Compliance to chemotherapy by the two groups**

| **Variable** | **IC group** | **AC group** |
| --- | --- | --- |
| Patients starting IC or AC,no. (%) | 133(100) | 130(97.74) |
| Patients received 2-3 cycles IC or AC,no. (%) | 133(100) | 124(93.23) |
| Patients did not receive CC | 2(1.5) | 0(0) |
| Patients received one cycle CC, no. (%) | 1(0.8) | 2(1.5) |
| Patients received two cycle CC, no. (%) | 38(28.57) | 22(16.54) |
| Patients received three cycle CC, no. (%) | 92(69.13) | 109(83.46) |
| Patients receiving protocol-defined cycles CC, no. (%) | 130（97.74） | 131（98.5） |
| Patients receiving concurrent dosage ＜200 mg/m2 , no. (%) | 3（2.26） | 2（1.5） |
| Patients receiving concurrent dosage > 200 mg/m2 , no. (%) | 130（97.74） | 131（98.5） |

IC =induction chemotherapy; AC = adjuvant chemotherapy; CC = concurrent chemotherapy

**eTable 3. Detailed information on the radiotherapy received by the two groups.**

| **Variable** | **IC group** | **AC group** |
| --- | --- | --- |
| Patients starting radiotherapy,no. (%) | 131(100) | 133(100) |
| Patients completing RT,no. (%) | 131(100) | 133(93.23) |
| Median (inter quartiles) dose of RT (Gy) | 72.35(69.96-72.6) | 72.35(69.96-72.6) |
| Median (inter quartiles) dose per fraction (Gy) | 2.19（2.12-2.2） | 2.19（2.12-2.2） |
| Median (inter quartiles) duration of RT (days) | 5(45-60) | 48(45-55) |

**eTable 4. 3-year progression-free survival for stage III and stage IVa population analysis**

| End point | Stage III population(n=120) | |  | Stage IVa population(n=146) | |
| --- | --- | --- | --- | --- | --- |
| 3–year survival (95% CI) | P value |  | 3–year survival (95% CI) | P value |
| PFS |  | P=0.767 |  |  | P=0.233 |
| AC group | 83.1%(50.42-60.36) |  |  | 67.7%(40.18-52.21) |  |
| IC group | 85.0%(51.98-62.46) |  |  | 75.4%(46.95-56.27) |  |
| Hazard ratio | 0.95(0.41-2.23) |  |  | 0.64(0.35-1.17) |  |

PFS =progression-free survival.

**eTable 5.** **3-year overall survival for per-protocol,stage III and stage IVa population analysis**

| End point | Per-protocol population(n=253) | |  | Stage III population(n=120) | |  | Stage IVa population(n=146) | |
| --- | --- | --- | --- | --- | --- | --- | --- | --- |
| 3–year survival (95% CI) | P value |  | 3–year survival (95% CI) | P value |  | 3–year survival (95% CI) | P value |
| OS |  | P=0.810 |  |  | P=0.594 |  |  | P=0.331 |
| AC group | 85.4%(54.59-61.01) |  |  | 86.0%(54.45-62.63) |  |  | 77.1%(46.54-56.98) |  |
| IC group | 86.8%(55.52-61.46) |  |  | 89.8%(55.79-64.61) |  |  | 83.2%(51.62-59.62) |  |
| Hazard ratio | 0.93(0.51-1.70) |  |  | 0.76(0.28-2.06) |  |  | 0.71(0.36-1.41) |  |

OS=overall survival

**eTable 6. 3-year** **locoregional relapse-free survival for per-protocol,stage III and stage IVa population analysis**

| End point | Per-protocol population(n=253) | |  | Stage III population  (n=120) | |  | Stage IVa population  (n=146) | |
| --- | --- | --- | --- | --- | --- | --- | --- | --- |
| 3–year survival (95% CI) | P value |  | 3–year survival (95% CI) | P value |  | 3–year survival (95% CI) | P value |
| LRFS |  | P=0.810 |  |  | P=0.594 |  |  | P=0.331 |
| AC group | 85.4%(54.59-61.01) |  |  | 86.0%(54.45-62.63) |  |  | 77.1%(46.54-56.98) |  |
| IC group | 86.8%(55.52-61.46) |  |  | 89.8%(55.79-64.61) |  |  | 83.2%(51.62-59.62) |  |
| Hazard ratio | 0.93(0.51-1.70) |  |  | 0.76(0.28-2.06) |  |  | 0.71(0.36-1.41) |  |

LRFS= locoregional relapse-free survival

**eTable 7. 3-year** **distant metastasis-free survival for per-protocol,stage III and stage IVa population analysis**

| End point | Per-protocol population(n=253) | |  |  | Stage III population  (n=120) | |  | Stage IVa population  (n=146) | |
| --- | --- | --- | --- | --- | --- | --- | --- | --- | --- |
| 3–year survival (95% CI) | P value |  |  | 3–year survival (95% CI) | P value |  | 3–year survival (95% CI) | P value |
| DMFS |  | P=0.64 |  |  |  | P=0.831 |  |  | P=0.180 |
| AC group | 82.8%(52.47-59.79) |  |  |  | 84.4%(52.20-61.67) |  |  | 74.7%(44.93-56.20) |  |
| IC group | 84.9%(54.50-60.84) |  |  |  | 86.8%(53.45-63.21) |  |  | 83.1%(52.09-60.18) |  |
| Hazard ratio | 0.87(0.48-1.56) |  |  |  | 0.91(0.37-2.22) |  |  | 0.62(0.30-1.25) |  |

DMFS=distant metastasis-free survival

**eTable 8. 3-year survival for intention-to-treat,per-protocol,stage III and stage IVa population analysis**

| End point | Intention-to-treat population(n=266) | |  | Per-protocol population(n=253) | |  |  | Stage III population  (n=120) | |  | Stage IVa population  (n=146) | |
| --- | --- | --- | --- | --- | --- | --- | --- | --- | --- | --- | --- | --- |
| 3–year survival (95% CI) | P value |  | 3–year survival (95% CI) | P value |  | | 3–year survival (95% CI) | P value |  | 3–year survival (95% CI) | P value |
| **Progression-free survival** |  | P=0.454 |  |  | P=0.717 |  | |  | P=0.767 |  |  | P=0.233 |
| AC group | 74.5%(47.54-55.43) |  |  | 77.5%(49.21-56.99) |  |  | | 83.1%(50.42-60.36) |  |  | 67.7%(40.18-52.21) |  |
| ICgroup | 79.0%(50.62-57.78) |  |  | 79.9%(51.22-58.31) |  |  | | 85.0%(51.98-62.46) |  |  | 75.4%(46.95-56.27) |  |
| Difference | 4.5%(0.52-1.34) |  |  | 2.4%(0.55-1.51) |  |  | | 1.9%(0.41-2.23) |  |  | 7.7%(0.35-1.17) |  |
| **Overall survival** |  | P=0.475 |  |  | P=0.810 |  | |  | P=0.594 |  |  | P=331 |
| AC group | 81.7%(52.53-59.36) |  |  | 85.4%(54.59-61.01) |  |  | | 86.0%(54.45-62.63) |  |  | 77.1%(46.54-56.98) |  |
| ICgroup | 84.5%(54.83-60.93) |  |  | 86.8%(55.52-61.46) |  |  | | 89.8%(55.79-64.61) |  |  | 83.2%(51.62-59.62) |  |
| Difference | 2.8%(0.47-1.42) |  |  | 1.4%(0.51-1.70) |  |  | | 3.8%(0.28-2.06) |  |  | 6.1%(0.36-1.41) |  |
| **Locoregional relapse-free survival** |  | P=0.924 |  |  | P=0.843 |  | |  | P=0.209 |  |  | P=0.322 |
| AC group | 93.5%(59.94-64.46) |  |  | 95.0%(59.73-64.33) |  |  | | 100%(65.0-65.0) |  |  | 89.6%(53.30-62.12) |  |
| ICgroup | 93.2%(60.33-64.72) |  |  | 93.8%(60.87-64.99) |  |  | | 92.8%(59.44-66.34) |  |  | 93.5%(58.44-64.15) |  |
| Difference | -0.3%(0.40-2.72) |  |  | -1.2%(0.34-2.42) |  |  | | -7.2%(0.44-41.08) |  |  | 3.9%(0.19-1.72) |  |
| **Distant metastasis-free survival** |  | P=0.348 |  |  | P=0.640 |  | |  | P=0.831 |  |  | P=0.180 |
| AC group | 78.4%(50.97-58.45) |  |  | 82.8%(52.47-59.79) |  |  | | 84.4%(52.20-61.67) |  |  | 74.7%(44.93-56.20) |  |
| ICgroup | 84.5%(54.24-60.61) |  |  | 84.9%54.50-60.84() |  |  | | 86.8%53.45-63.21() |  |  | 83.1%(52.09-60.18) |  |
| Difference | 6.1%(0.44-1.33) |  |  | 2.1%(0.48-1.56) |  |  | | 2.4%(0.37-2.22) |  |  | 8.4%(0.30-1.25) |  |

**eTable 9. Response to treatment and survival outcomes in the two group patients**

| Variable | IC group  n=133 | AC group  n=133 | Hazard ratio  (95% CI) | *P* value |
| --- | --- | --- | --- | --- |
| Response to whole treatment |  |  |  |  |
| CR — no. (%) | 44(33.08%) | 42(31.58%) | - | - |
| PR— no. (%) | 84(63.16%) | 83(62.40%) | - | - |
| SD— no. (%) | 5(3.76%) | 4(3.01%) | - | - |
| PD— no. (%) | 0(0%) | 4(3.01%) | - | - |
| Progression-free survival |  |  |  |  |
| Progression cases — no. (%) | 32(24.06%) | 36(27.07%) |  |  |
| Proportion of patients without progression at 3 years | 79.0% | 74.5% | 1.20(0.75-1.93) | 0.454 |
| Overall survival |  |  |  |  |
| Deaths — no. (%) | 23(17.29%) | 27(20.30%) |  |  |
| Proportion of patients alive at 3 years | 84.5% | 81.7% | 1.23(0.70-2.14) | 0.475 |
| Locoregional failure-free survival |  |  |  |  |
| Locoregional failures— no. (%) | 9(6.77%) | 8(6.02%) |  |  |
| Proportion of patients without locoregional failures at 3 years | 93.2% | 93.5% | 0.95(0.37-2.48) | 0.924 |
| Distant metastasis-free survival |  |  |  |  |
| Distant failures— no. (%) | 23(17.29%) | 28(21.05%) |  |  |
| Proportion of patients without distant failures  at 3 years | 84.5% | 78.4% | 1.30(0.75-2.26) | 0.348 |

Data are n (%) or % (95% CI). Hazard ratios were calculated using the unadjusted Cox proportional-hazards model. p values were calculated using the unadjusted log-rank test. The complete responses were compared using the unadjusted χ² test, thus hazard ratios and 95% CIs were not provided.

**eTable 10.****EBV DNA copies after treatment in two groups**

| Post-treatment copies of EBV DNA | IC group (n=133) | AC group (n=133) |
| --- | --- | --- |
| Undetectable | 127 (95.49) | 109 (81.95) |
| Detectable | 6(4.51) | 24 (18.05) |

**eTable 11.Acute Adverse Events in Safety Population**

| Adverse events(grade) | 0 | 1 | 2 | 3 | 4 | Z | *P* value |
| --- | --- | --- | --- | --- | --- | --- | --- |
| Adverse events during IC and AC phase | | | | | | | |
| Hematologicalc, No. (%) |  |  |  |  |  |  |  |
| Leukopenia |  |  |  |  |  | -3.779 | 0.000 |
| IC group | 9(6.88) | 12(9.16) | 52(39.69) | 46(35.11) | 12(9.16) |  |  |
| AC group | 15(11.72) | 15(11.72) | 70(54.69) | 28(21.87) | 0 |  |  |
| Neutropenia |  |  |  |  |  | -7.402 | 0.000 |
| IC group | 12(9.16) | 9(6.88) | 32(24.43) | 44(33.59) | 34(25.94) |  |  |
| AC group | 37(28.90) | 26(20.31) | 41(32.03) | 22(17.19) | 2(1.57) |  |  |
| Anemia |  |  |  |  |  | -2.033 | 0.000 |
| IC group | 78(59.54) | 38(29.01) | 11(8.40) | 4(3.05) | 0 |  |  |
| AC group | 63(49.22) | 45(35.16) | 17(13.28) | 3(2.34) | 0 |  |  |
| Thrombocytopenia |  |  |  |  |  | -0.792 | 0.428 |
| IC group | 118(90.07) | 9(6.88) | 4(3.05) | 0 | 0 |  |  |
| AC group | 110(85.94) | 9(7.03) | 9(7.03) | 0 | 0 |  |  |
| Nonhematologicalc, No. (%) |  |  |  |  |  |  |  |
| Nausea/vomiting |  |  |  |  |  | -1.583 | 0.113 |
| IC group | 20(15.27) | 70(53.43) | 35(26.72) | 6(4.58) | 0 |  |  |
| AC group | 25(19.53) | 71(55.47) | 27(21.09) | 5(3.91) | 0 |  |  |
| Diarrhea |  |  |  |  |  | -5.320 | 0.000 |
| IC group | 77(58.78) | 26(19.85) | 18(13.74) | 9(6.88) | 1(0.75) |  |  |
| AC group | 109(85.16) | 12(9.38) | 6(4.68) | 1(0.78) | 0 |  |  |
| Hepatoxicity |  |  |  |  |  | -3.891 | 0.000 |
| IC group | 93(70.99) | 30(22.90) | 8(6.11) | 0 | 0 |  |  |
| AC group | 113(88.28) | 13(10.15) | 2(1.57) | 0 | 0 |  |  |
| Nephrotoxicity |  |  |  |  |  | -3.542 | 0.000 |
| IC group | 119(90.84) | 10(7.63) | 2(1.53) | 0 | 0 |  |  |
| AC group | 94(73.44) | 28(21.88) | 6(4.68) | 0 | 0 |  |  |
| Adverse events during concurrent chemoradiotherapy phase | | | | | | | |
| Hematologicalc, No. (%) |  |  |  |  |  |  |  |
| Leukopenia |  |  |  |  |  | -2.143 | 0.032 |
| IC group | 11(8.40) | 13(9.92) | 63(48.09) | 39(29.77) | 5(3.82) |  |  |
| AC group | 18(14.06) | 14(10.94) | 67(52.34) | 28(21.88) | 1(0.78) |  |  |
| Neutropenia |  |  |  |  |  | -3.671 | 0.000 |
| IC group | 23(17.55) | 17(12.98) | 56(42.75) | 27(20.61) | 8(6.11) |  |  |
| AC group | 47(36.72) | 20(15.62) | 38(29.69) | 20(15.63) | 3(2.34) |  |  |
| Anemia |  |  |  |  |  | -1.630 | 0.103 |
| IC group | 57(43.51) | 40(30.53) | 30(22.90) | 2(1.53) | 2(1.53) |  |  |
| AC group | 65(50.78) | 39(30.47) | 21(16.40) | 2(1.57) | 1(0.78) |  |  |
| Thrombocytopenia |  |  |  |  |  | -1.774 | 0.076 |
| IC group | 101(77.10) | 15(11.45) | 11(8.40) | 4(3.05) | 0 |  |  |
| AC group | 107(83.59) | 15(11.72) | 4(3.13) | 1(0.78) | 1(0.78) |  |  |
| Nonhematologicalc, No. (%) |  |  |  |  |  |  |  |
| Nausea/vomiting |  |  |  |  |  | -3.074 | 0.002 |
| IC group | 30(22.90) | 68(51.91) | 31(23.66) | 2(1.53) | 0 |  |  |
| AC group | 14(10.94) | 63(49.22) | 44(34.38) | 7(5.46) | 0 |  |  |
| Dermatitis |  |  |  |  |  | -2.402 | 0.016 |
| IC group | 9(6.87) | 101(77.10) | 19(14.50) | 2(1.53) | 0 |  |  |
| AC group | 6(4.69) | 85(66.41) | 27(21.09) | 10(7.81) | 0 |  |  |
| Mucositis |  |  |  |  |  | -2.769 | 0.006 |
| IC group | 5(3.82) | 53(40.47) | 62(47.33) | 10(7.63) | 1(0.75) |  |  |
| AC group | 3(2.34) | 34(26.56) | 66(51.57) | 25(19.53) | 0 |  |  |
| Swallowing |  |  |  |  |  | -2.579 | 0.010 |
| IC group | 91(69.47) | 33(25.18) | 5(3.82) | 2(1.53) | 0 |  |  |
| AC group | 72(56.25) | 31(24.22) | 19(14.84) | 6(4.69) | 0 |  |  |
| Dry |  |  |  |  |  | -4.157 | 0.000 |
| IC group | 73(55.73) | 49(37.40) | 9(6.87) | 0 | 0 |  |  |
| AC group | 42(32.81) | 60(46.88) | 26(20.31) | 0 | 0 |  |  |
| Hepatoxicity |  |  |  |  |  | -0.864 | 0.388 |
| IC group | 113(86.27) | 17(12.98) | 1(0.75) | 0 | 0 |  |  |
| AC group | 104(81.25) | 22(17.19) | 1(0.78) | 1(0.78) | 0 |  |  |
| Nephrotoxicity |  |  |  |  |  | -0.967 | 0.334 |
| IC group | 95(75.52) | 30(22.90) | 6(4.58) | 0 | 0 |  |  |
| AC group | 82(64.06) | 40(31.25) | 5(3.91) | 1(0.78) | 0 |  |  |

Data are No.(%). p values were calculated with the Fisher’s exact test.

**eTable 12.** **Salvage treatments after relapse and metastasis**

|  | AC group  (n=133) | IC group  (n=133) |
| --- | --- | --- |
| Treatments after locoregional relapse |  |  |
| Surgery +/- adjuvant chemotherapy or radiotherapy | 1 | 0 |
| Chemotherapy only | 1 | 1 |
| Radiotherapy only | 1 | 0 |
| Chemoradiotherapy | 1 | 1 |
| Anti-PD-1+ chemotherapy or radiotherapy | 3 | 5 |
| Traditional Chinese medicine | 1 | 2 |
| Unknown | 0 | 0 |
| Treatments after distant metastasis |  |  |
| Chemotherapy | 4 | 2 |
| Radiotherapy | 1 | 2 |
| Anti-PD-1+ chemotherapy or radiotherapy | 15 | 14 |
| Traditional Chinese medicine | 5 | 3 |
| Unknown | 3 | 2 |

PD-1:PD-1 immune checkpoint inhibitors.

**eTable13. Ways for follow-up assessments**

| Ways for follow-up | AC group  (n=133) | IC group  (n=133) |
| --- | --- | --- |
| By assessments at study center | 123 | 122 |
| By assessments at other centers | 10 | 8 |
| By phone calls | 0 | 3 |


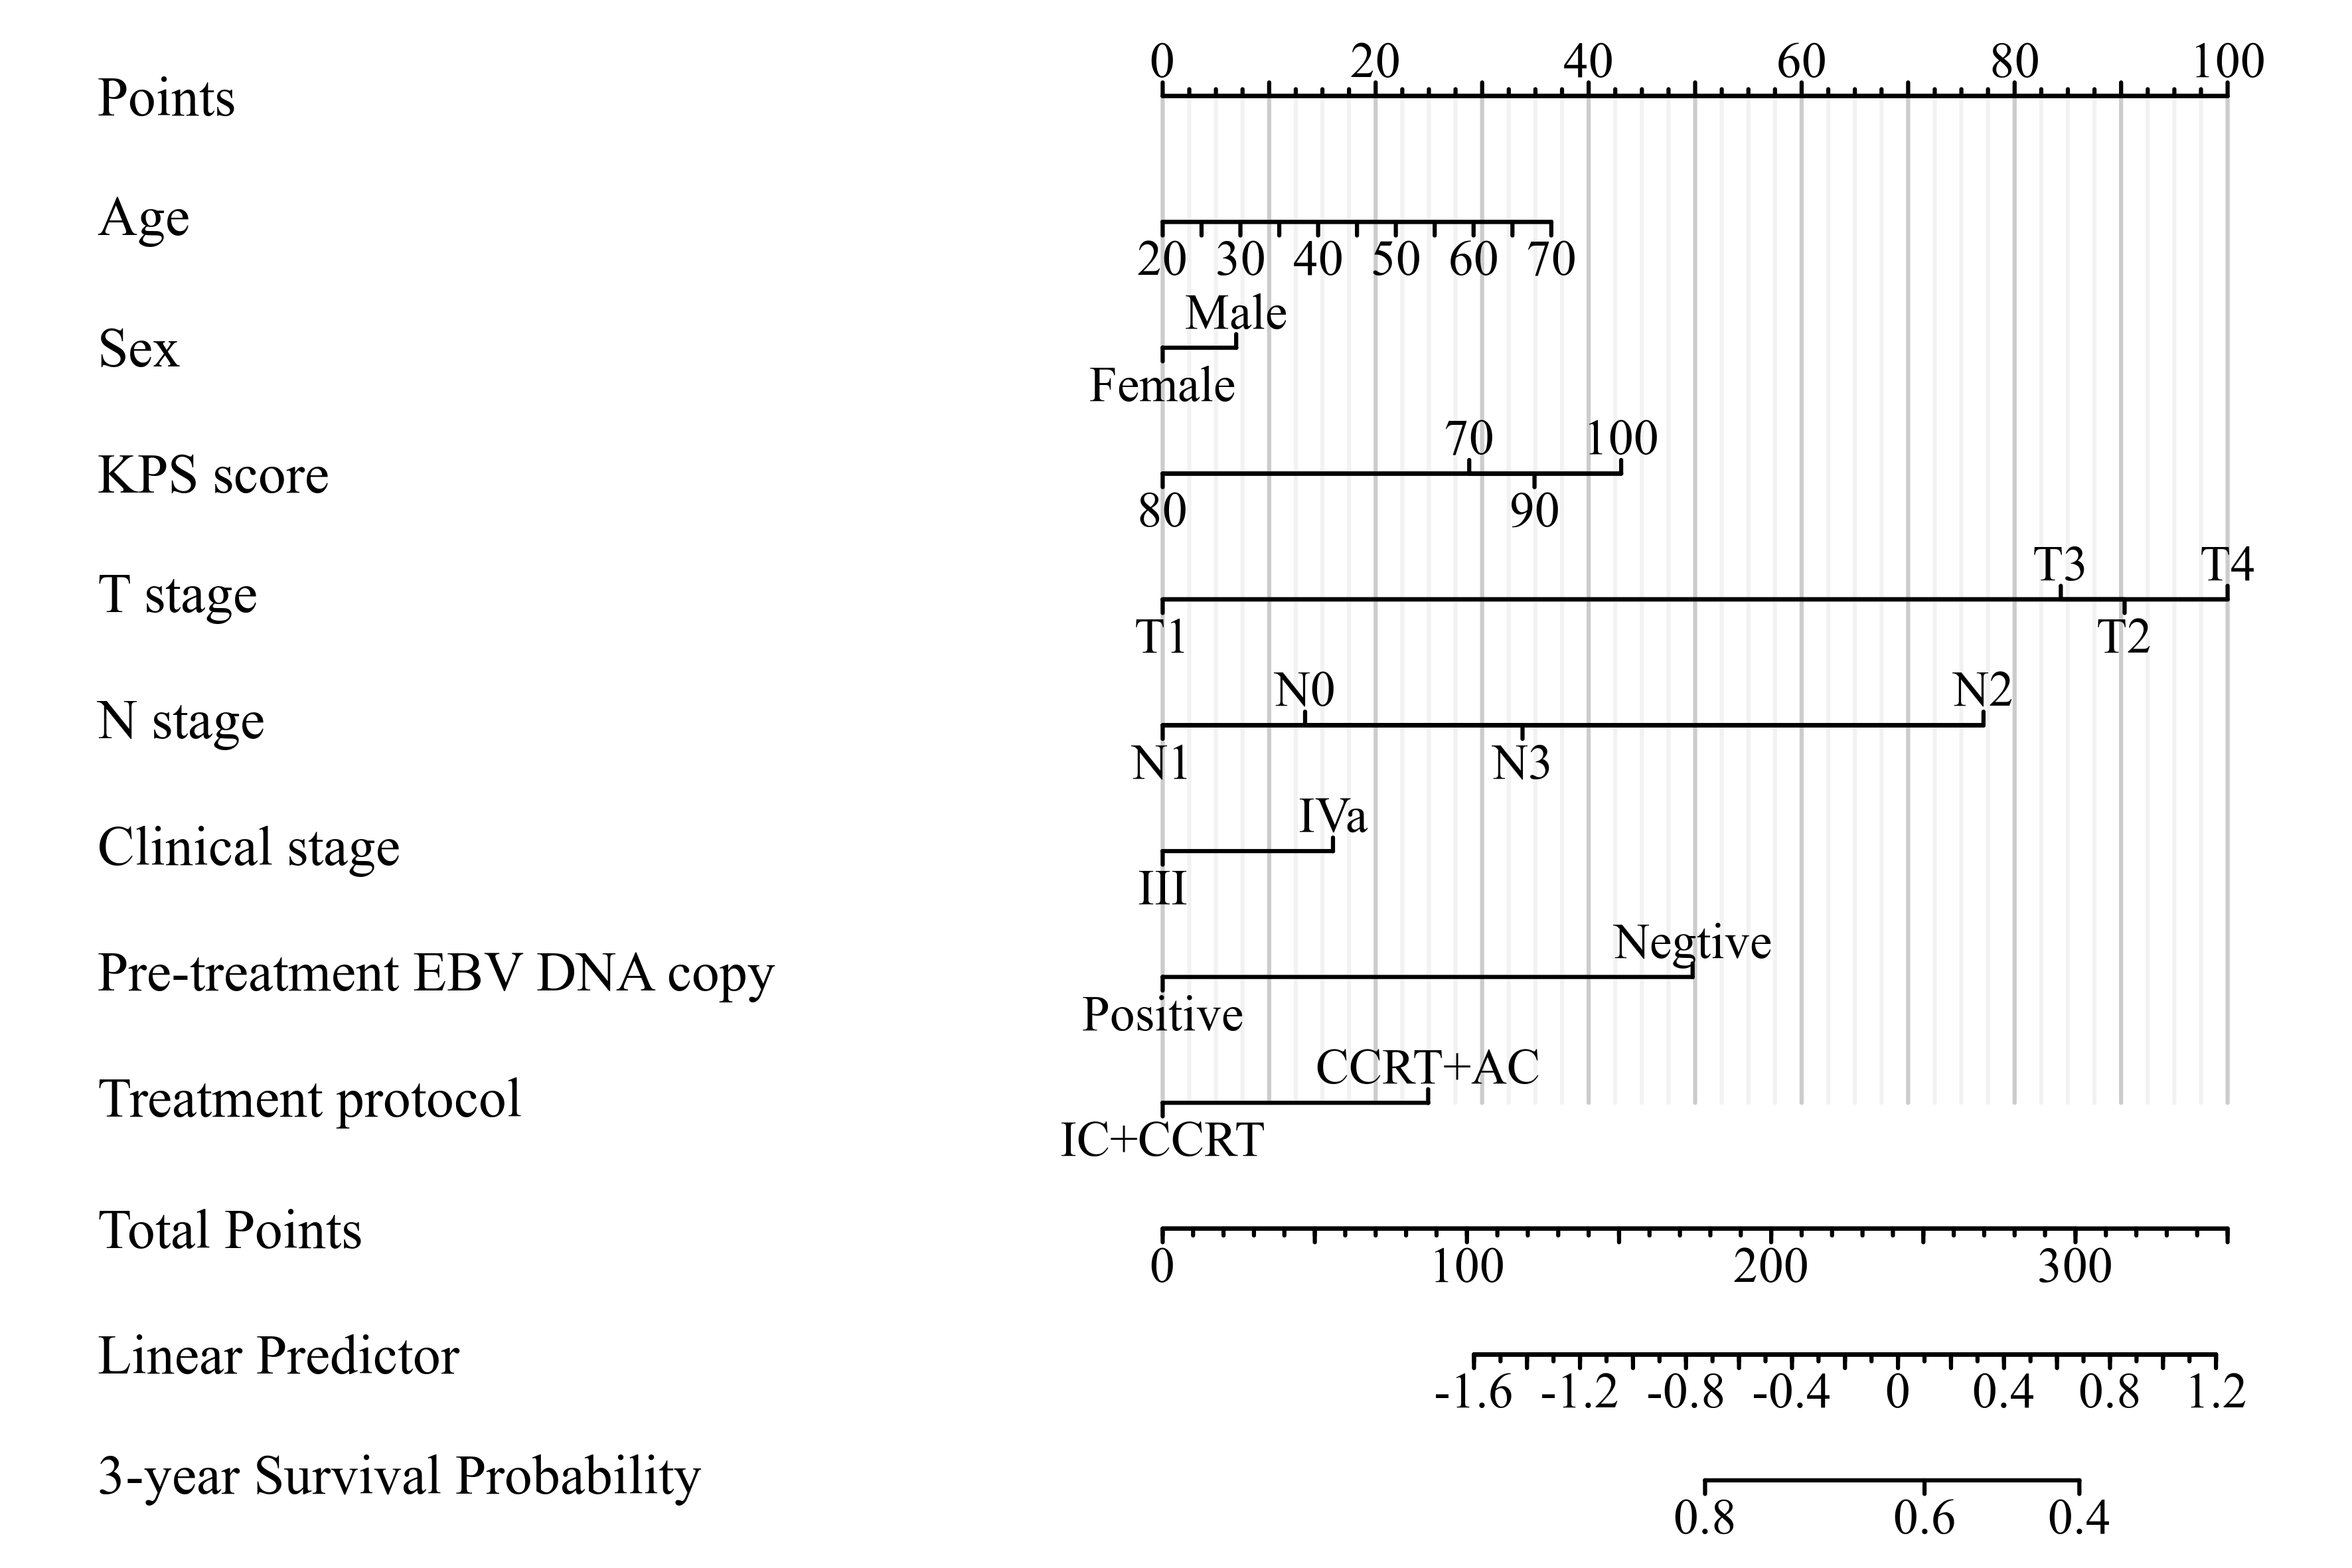


eFigure 1.Nomogram graph for progression-free survival in different patient subgroups.
